# Supplementary material for: Genome-wide analysis of WRKY transcription factors in white pear (Pyrus bretschneideri) reveals evolution and patterns under drought stress
Source: PubMed Central journal article supplement (PMC4691019; doi:10.1186/s12864-015-2233-6), 2015-12-24

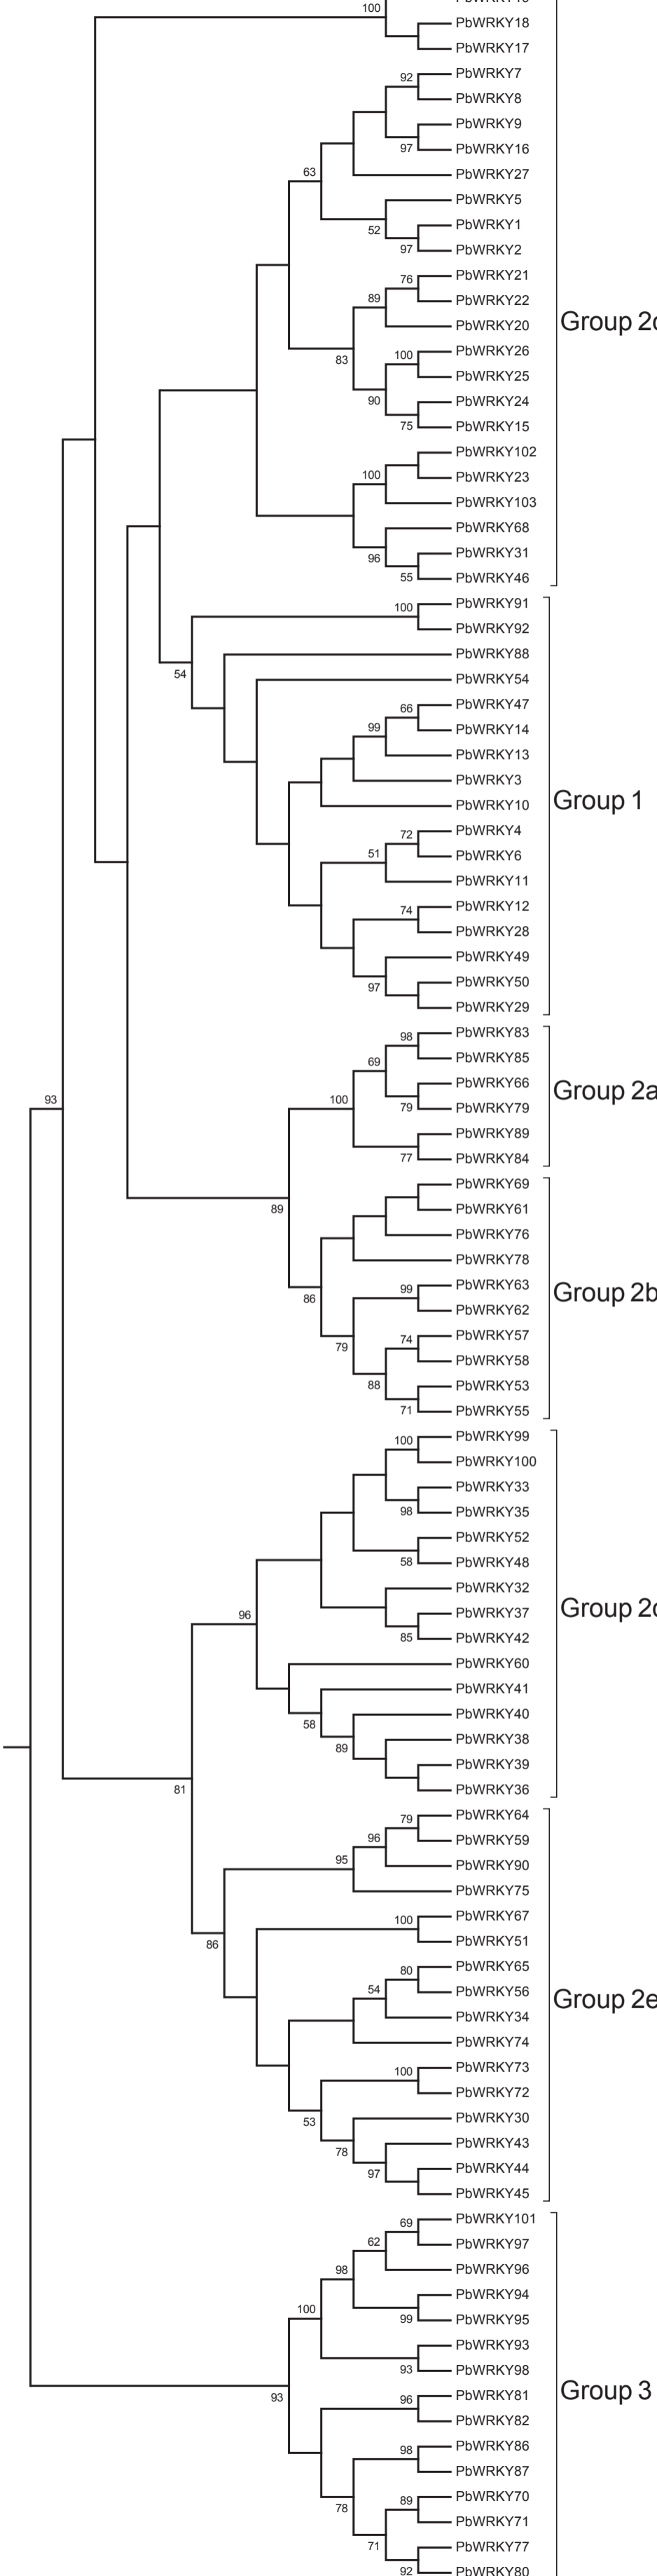

Supplement: 12864_2015_2233_MOESM2_ESM.pdf [file 12864_2015_2233_MOESM2_ESM.pdf]
